# Supplementary material
Source: Research Square preprint supplement (doi:10.21203/rs.3.rs-9113149/v1)
Supplement: Supplementary file 1 [file 00834613baffa5c51be43515.pdf]

## 1 Extended Data

---

### 2 Chronostratigraphic framework and age control across cores

3 Accurately constraining the age of Arctic Ocean sediments, particularly those corresponding to low  $^{230}\text{Th}_{\text{xs}}$  and low  
4 authigenic  $^{10}\text{Be}/^9\text{Be}$  intervals, is challenging due to the limitations of traditional dating methods. Extremely low  
5 sedimentation rates, poor carbonate preservation <sup>1,2</sup>, and the restricted hydrographic connection of the Arctic Ocean  
6 to the global oceans severely limit the use of  $\delta^{18}\text{O}$ -stratigraphy and subsequent classical MIS assignment.

7 In their pan-Arctic synthesis, Geibert et al., 2021 identified two prominent low- $^{230}\text{Th}_{\text{xs}}$  intervals traceable across the  
8 Arctic Ocean and into the Nordic Seas. The older interval was interpreted as corresponding to MIS6 and likely  
9 predates 131 ka. A younger, less pronounced low- $^{230}\text{Th}_{\text{xs}}$  interval was attributed to MIS4 (ca. 70 – 62 ka), potentially  
10 terminating near Heinrich Event 6. A third, late-glacial minimum tentatively linked to MIS2 (~18 – 15 ka) has been  
11 reported only at high-accumulation sites near the Yermak Plateau and Fram Strait and is not clearly expressed in  
12 Nordic Seas records. As mentioned in Geibert et al. (2021), given the ongoing dispute about the age of younger  
13 Pleistocene sediments, there is not yet a strict proof that the low  $^{230}\text{Th}_{\text{xs}}$  intervals occurred at the exact same time in  
14 all cores. However, for subpolar cores the age constraints are clearer.

15 Here, we follow most of these age assignments and further specify some of them using additional lithological  
16 observations, magnetic susceptibility (MS) correlations, extinction ages of excess  $^{230}\text{Th}$  and  $^{231}\text{Pa}$ , and a re-evaluation  
17 of published isotope records <sup>4</sup>.

### 18 Fram Strait, Yermak Plateau and Barents Sea

19 The chronostratigraphic framework of Geibert et al. (2021) relies primarily on core PS1533-3, which contains both  
20  $^{230}\text{Th}_{\text{xs}}$  and bulk  $^{10}\text{Be}$  concentration records <sup>5,6</sup>. In this core, two samples with low authigenic  $^{10}\text{Be}/^9\text{Be}$  ratios are  
21 located slightly above two distinct dark lithological layers, the uppermost layer was taken close to a light  $\delta^{18}\text{O}$  peak  
22 that marks the MIS 5/6 transition. The lower sample at 452.5 cm in late MIS6 may correspond to the dark layers in  
23 PS1235-2 and GIK23065-3.

24 In PS1235-2, our  $^{10}\text{Be}/^9\text{Be}$  record is based on a limited number of measurements spanning an interglacial-glacial  
25 transition. The  $^{230}\text{Th}_{\text{xs}}$  record of core PS1235-2 was correlated to GIK23059, which isotope stratigraphy is well  
26 described <sup>7</sup>. The lowest  $^{10}\text{Be}/^9\text{Be}$  ratio occurs within a dark grey interval enriched in coal fragments, which likely  
27 corresponds to late MIS6 and matches a similar dark interval in GIK23065-3. These coal-rich layers have previously  
28 been interpreted as reflecting enhanced input of terrigenous organic material sourced from Siberian shelf regions <sup>8</sup>

29 Core PS2138-1 from the Barents Sea, north of Svalbard, was dated using planktic foraminiferal  $\delta^{18}\text{O}$  and  $\delta^{13}\text{C}$  <sup>9,10</sup>,  
30 supplemented by AMS radiocarbon ages for the younger section. Although the  $\delta^{18}\text{O}$  signal may be influenced by  
31 local meltwater effects, it broadly matches global stacks and allows assignment of marine isotope stages down to  
32 MIS6.

### 33 Lomonosov and Mendeleev Ridges

34 AMS radiocarbon ages from Lomonosov Ridge cores (PS2185-3/6, PS87/030-1) and PS2200-5 from the Morris Jesup  
35 Rise, combined with lithological correlations to Mendeleev Ridge records (PS51/038-4, PS72/396-5), confirm that  
36 the upper widespread low- $^{230}\text{Th}_{\text{xs}}$  interval (MIS 4) clearly predates MIS 2. Radiocarbon constraints suggest ages older  
37 than 32,500 – 34,300  $^{14}\text{C}$  yr for the Lomonosov Ridge <sup>11,12</sup> and >43,000  $^{14}\text{C}$  yr for the Mendeleev Ridge <sup>13–15</sup>.

38 The presence of  $^{230}\text{Th}_{\text{xs}}$  below both low-salinity intervals in the central Arctic and a weak  $^{231}\text{Pa}_{\text{xs}}$  signal in the upper  
39 part of PS87/030-1 suggests that the lower interval is younger than ~150 ka <sup>12</sup>. However, significant uncertainties

40 remain. In some records (e.g., PS51/038-4, PS2185-3/6), *Emiliana huxleyi* has been reported below the nominal MIS  
41 6 low-<sup>230</sup>Th<sub>xs</sub> interval <sup>16</sup>, implying much higher sedimentation rates. As this occurrence could not be confirmed in  
42 subsequent work (Razmjooei et al., 2023), we adopt the older age model <sup>17</sup> for PS2185-6, supported by recent work  
43 <sup>4</sup> consistent with lower sedimentation rates on the Lomonosov Ridge.

44 In PS2200-5, age control relies on correlation to PS2185-6 due to the scarcity of other age markers. While lithological  
45 similarities suggest a possible MIS6 assignment, the two samples with low <sup>10</sup>Be/<sup>9</sup>Be ratios in PS2200-5 are not  
46 associated with dark or coal-bearing layers, and a late MIS6 age — analogous to southern cores — cannot be firmly  
47 inferred.

48 Revised interpretations for PS87/030-1 by Song et al. (2023) indicate that previously assigned MIS6 sections may be  
49 affected by a hiatus between ~62 - 65 cm depth. Combined with extinction ages of <sup>230</sup>Th and <sup>231</sup>Pa, low <sup>10</sup>Be/<sup>9</sup>Be  
50 ratios at 23.5 and 40.5 cm are likely younger than MIS5 and may correspond to MIS4, whereas a higher ratio at 65.5  
51 cm likely rather reflects MIS5 conditions. The presence of a *Bulimina aculeata* peak below ~70 cm, previously  
52 attributed to MIS7, further supports a stratigraphic discontinuity within the nominal MIS6 interval <sup>12</sup>. The hiatus  
53 during MIS6 may explain the absence of low <sup>10</sup>Be/<sup>9</sup>Be ratio recorded around 60.5 cm depth, where Geibert et al.  
54 (2021) placed the oldest low <sup>230</sup>Th<sub>xs</sub> event.

## 55 **Nordic Seas and North Atlantic**

56 The age model of core GIK23065-3 from the Nordic Seas is based on  $\delta^{18}\text{O}$  stratigraphy <sup>18</sup> and MIS assignments  
57 constrained by <sup>230</sup>Th<sub>xs</sub> <sup>19</sup>. In this study, GIK23065-3 is correlated using both  $\delta^{18}\text{O}$  and authigenic <sup>10</sup>Be/<sup>9</sup>Be minima  
58 during glacial intervals (**Extended Data Figure 3**). The late MIS6 low-<sup>10</sup>Be/<sup>9</sup>Be interval coincides with a dark grey, coal-  
59 rich layer, consistent with enhanced terrigenous input.

60 The North Atlantic core MD95-2016 <sup>20</sup> provides independent age control, with its age model derived through  
61 alignment of planktic  $\delta^{18}\text{O}$  to a probabilistic Pliocene-Pleistocene benthic  $\delta^{18}\text{O}$  stack <sup>21</sup>, following the LR04 framework  
62 <sup>22</sup>

## 63 **Synthesis and implications**

64 Taken together, revised extinction ages, lithological observations, and the distribution of coal-bearing layers indicate  
65 that low authigenic <sup>10</sup>Be/<sup>9</sup>Be ratios are preferentially associated with full glacial conditions rather than intervals of  
66 elevated sedimentation rates. In some subpolar and Nordic Seas records, late MIS6 low-ratio intervals coincide with  
67 dark, coal-rich layers, consistent with enhanced supply of Siberian terrigenous material <sup>8</sup>. In contrast, central Arctic  
68 cores with low <sup>10</sup>Be/<sup>9</sup>Be ratios not systematically associated with dark layers or coal enrichment, however they show  
69 an increase in smectite content, which points out to a Siberian source <sup>23</sup>. However, for the central Arctic cores a  
70 higher sampling resolution could help to improve stratigraphic correlation to other cores and identify late MIS6.

71 Accordingly, while late MIS6 represents the most consistent interval for low <sup>10</sup>Be/<sup>9</sup>Be ratios in subpolar records, their  
72 occurrence in the central Arctic cannot be assumed to be strictly synchronous. The use of <sup>10</sup>Be/<sup>9</sup>Be minima as  
73 stratigraphic markers should therefore be regarded as a testable working hypothesis rather than a definitive  
74 chronostratigraphic tool, particularly for central Arctic sites.

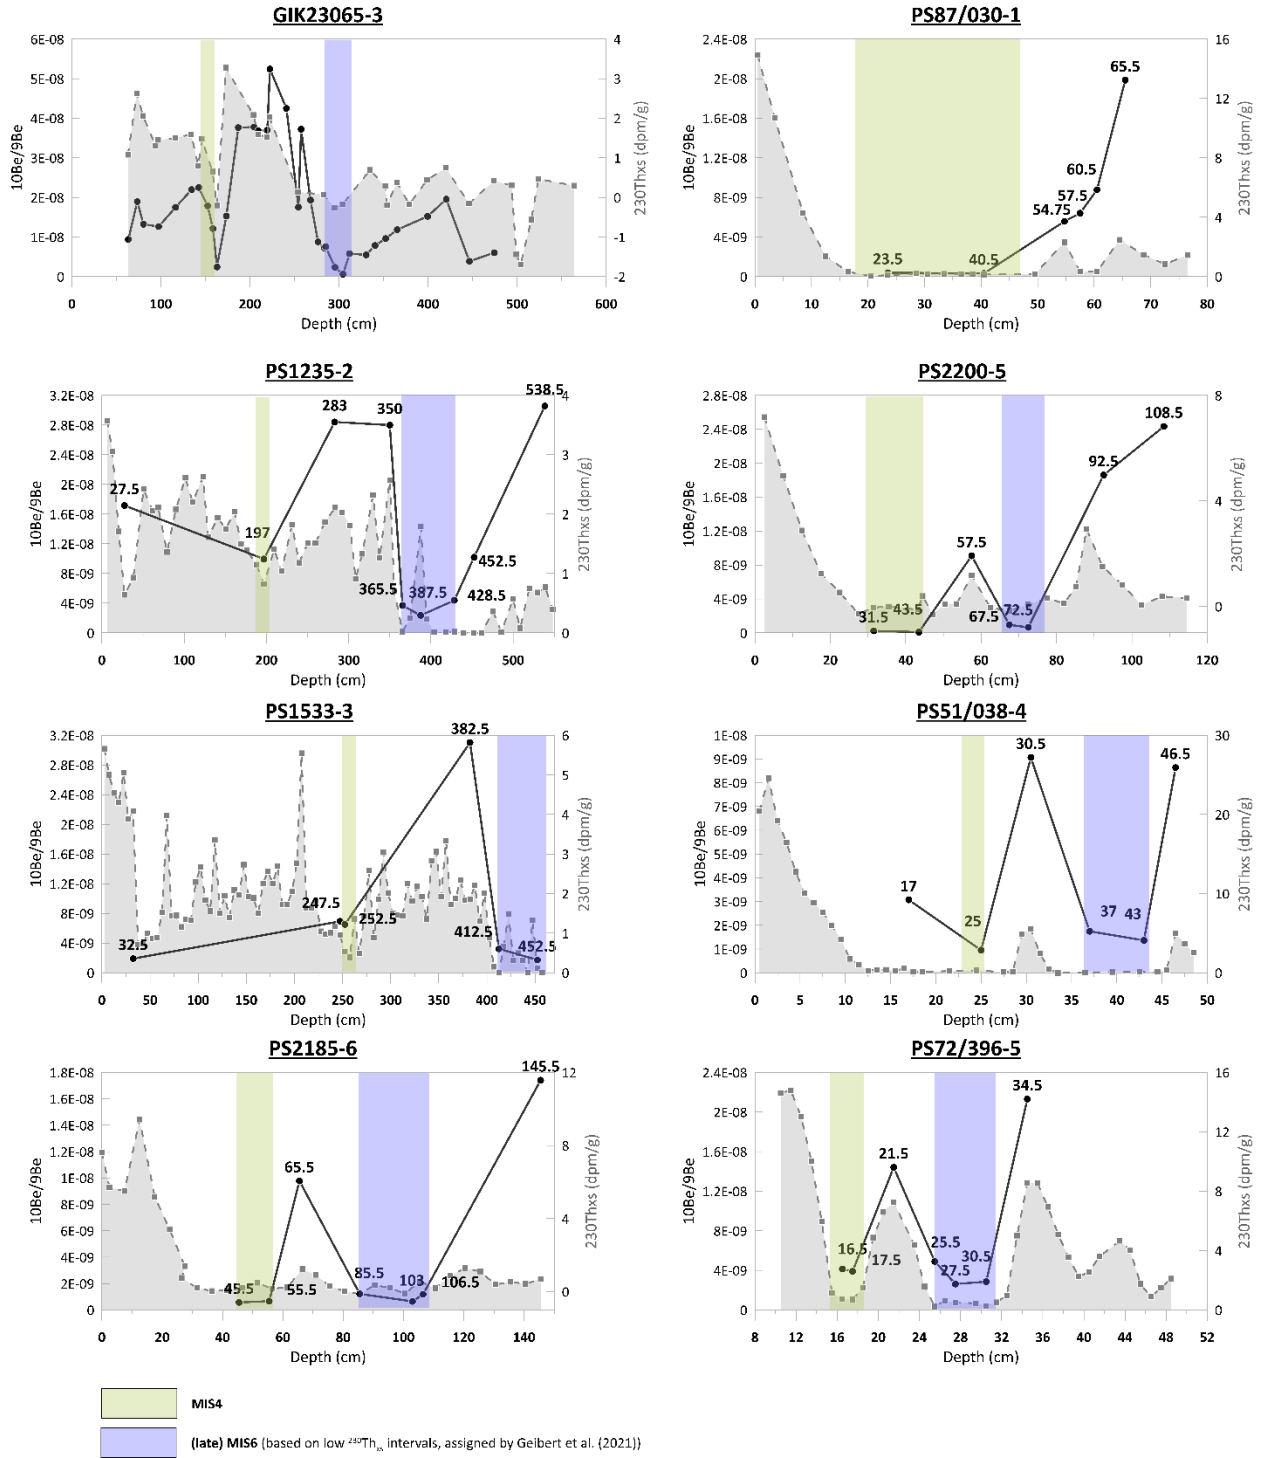

75

76

77 **Extended Data Fig. 1 |** Compilation of authigenic  $^{10}\text{Be}/^9\text{Be}$  ratios (at/at) (in black) measured within intervals of  
 78 **low  $^{230}\text{Th}_{\text{xs}}$  (dpm/g) reported by Geibert et al. (2021).  $^{230}\text{Th}_{\text{xs}}$  records (in grey) are from Geibert et al. (2021) and**  
 79 **references therein, except for GIK23065-3 from this study. Please note the different scales used for  $^{230}\text{Th}_{\text{xs}}$ . Green**  
 80 **and blue shaded bands indicate their proposed correlations to MIS4 and (late) MIS6, respectively. Numbers denote**  
 81 **sample depths (cm).**

82  
83

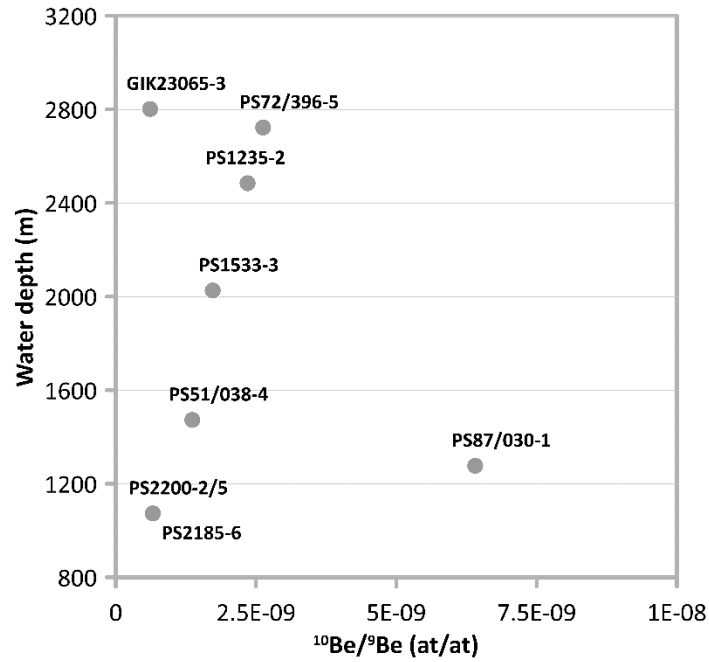

84  
85  
86  
87  
88  
89  
90  
91  
92  
93

**Extended Data Fig. 2 | Water depth vs. authigenic  $^{10}\text{Be}/^9\text{Be}$  during  $^{230}\text{Th}_{\text{xs}}$ -minima interval (MIS6).** Despite the different core locations and water depths, ranging from  $\sim 1000$  m to nearly 3000 m, the  $^{10}\text{Be}/^9\text{Be}$  ratios measured during low  $^{230}\text{Th}_{\text{xs}}$  (glacial) intervals are remarkably homogeneous.

As mentioned in **Main Text Fig. 1**; the minima in PS87/030-1 can be explained by the presence of a hiatus of late MIS6 in the core<sup>4</sup>. The actual measurement could then be associated to MIS5 rather than MIS6, explaining the higher  $^{10}\text{Be}/^9\text{Be}$  ratio.

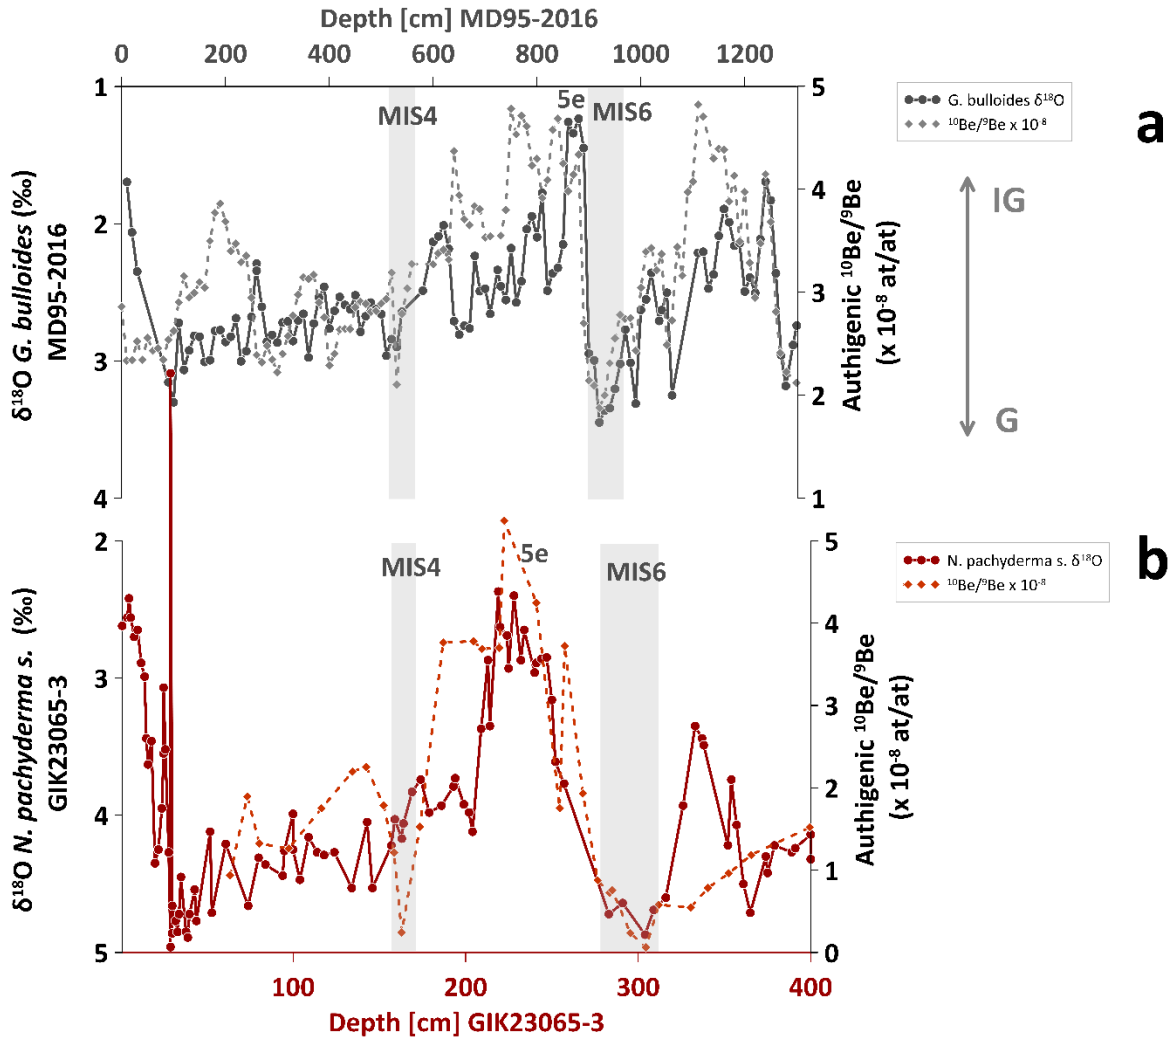

94  
95

96 **Extended Data Fig. 3 |  $\delta^{18}\text{O}$  and authigenic  $^{10}\text{Be}/^9\text{Be}$  records of MD95-2016 and GIK23065-3.**

97 **a)**  $\delta^{18}\text{O}$  from Savranskaia et al. (2024) has been correlated in the same study to the probabilistic benthic  $\delta^{18}\text{O}$  stack  
98 from Ahn et al. (2017) (and allows a placement of MIS5 between the two grey shaded intervals marked as MIS6 and  
99 MIS4.

100 **b)**  $\delta^{18}\text{O}$  and age constraints from (Vogelgesang, 1990) used in this study for MIS6 to MIS4. The GIK23065-3 core is  
101 plotted against composite depth (and refers to GIK23065-2/3).

102 IG and G represent respectively interglacial and glacial periods. Authigenic  $^{10}\text{Be}/^9\text{Be}$  ratios from MD95-2016 and  
103 GIK23065-3 are respectively from Savranskaia et al. (2024) and this study.

104

105 To anchor the low- $^{230}\text{Th}_{\text{xs}}$  intervals in a regional and global timescale, we use the MD95-2016 core's high-resolution  
106 planktic  $\delta^{18}\text{O}$  record <sup>20</sup>, which has been tied to the probabilistic benthic  $\delta^{18}\text{O}$  stack (Ahn et al., 2017) and allows to  
107 constrain MIS 6 – 4 in the North Atlantic (ED Fig. 3). We then transfer this chronology to our Nordic Seas record,  
108 GIK23065-3, using the Vogelgesang (1990) age model on its  $\delta^{18}\text{O}$  sequence (Main Text Fig. 2b). With age control  
109 established over MIS6, 5, and 4 we compare authigenic  $^{10}\text{Be}/^9\text{Be}$  signals in both MD95-2016 and GIK23065-3 cores  
110 (Main Text Fig. 2a and b) and extend the analysis to multiple Arctic sites (Main Text Fig. 2c).

111

112

113

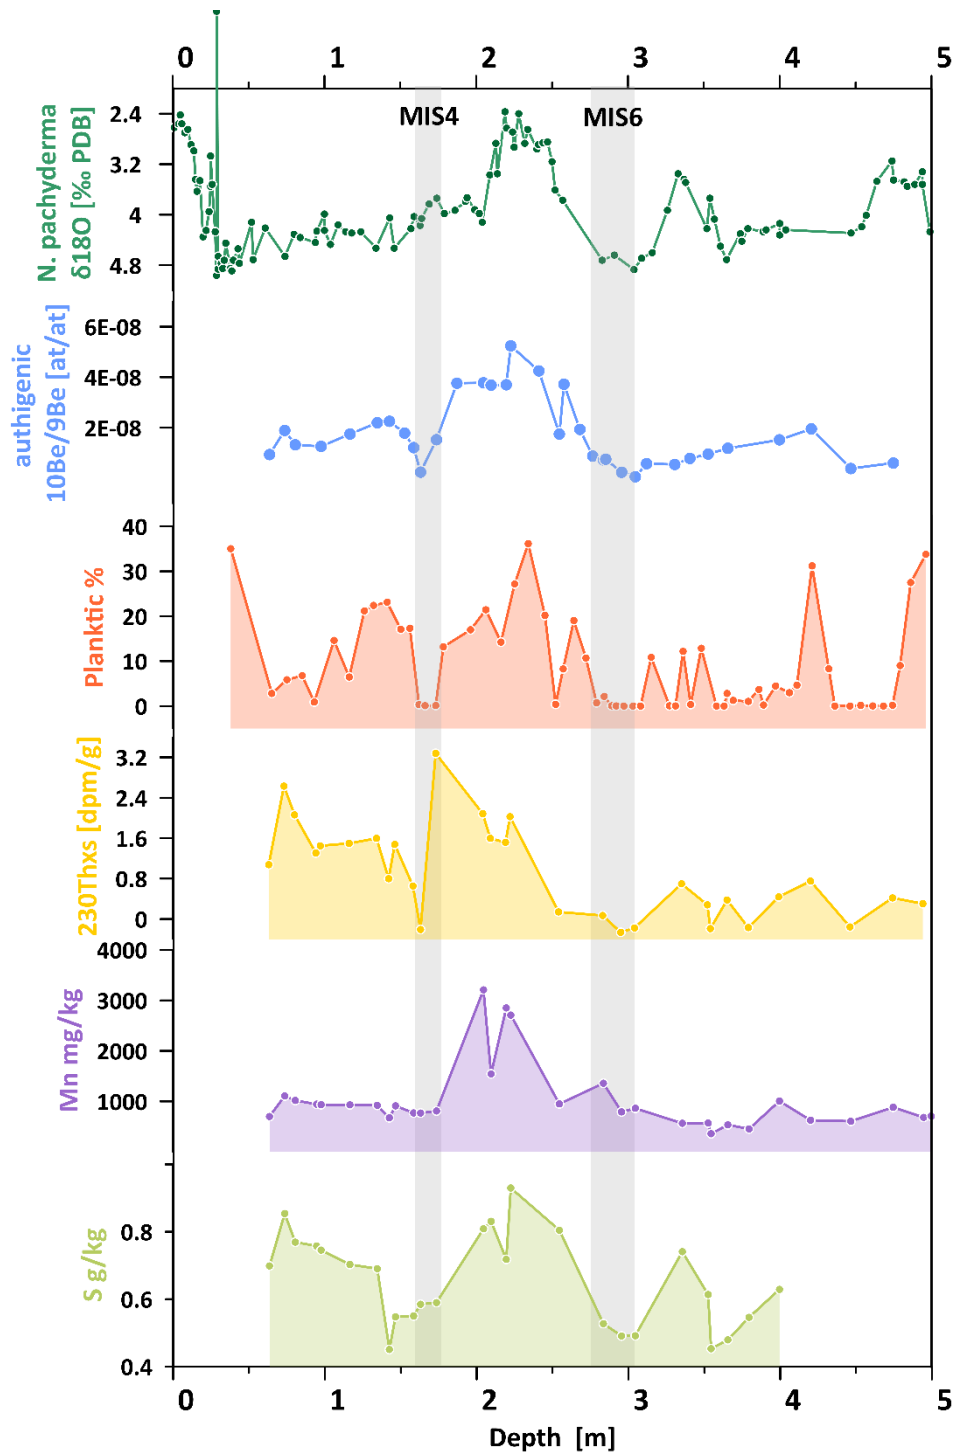

114  
 115  
 116  
 117  
 118  
 119  
 120

**Extended Data Fig. 4 | Multi proxy analysis of GIK23065-3.** *N. pachyderma*  $\delta^{18}\text{O}$  (Vogelsang, 1990), authigenic  $^{10}\text{Be}/^9\text{Be}$  ratio (this study), planktic foraminifera counts (percentage count of the 125 – 500  $\mu\text{m}$  fraction; (Henrich, 1992), excess- $^{230}\text{Th}$  and Mn and S (this study) are plotted together. Grey shaded bands mark glacial intervals characterized by simultaneous minima in  $^{10}\text{Be}/^9\text{Be}$ , planktic foraminifera counts, and  $^{230}\text{Th}_{\text{xs}}$ .

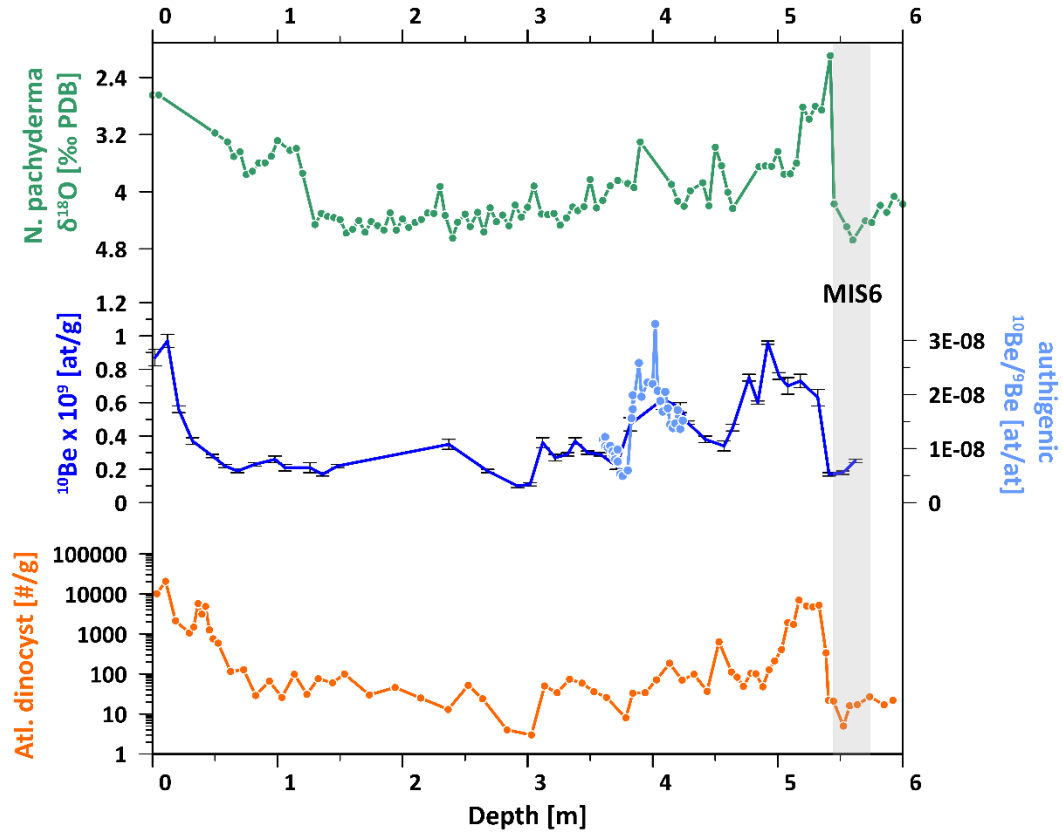

121  
 122  
 123  
 124  
 125  
 126  
 127  
 128  
 129

**Extended Data Fig. 5 | Multi proxy analysis of PS2138-1.** *N. pachyderma*  $\delta^{18}\text{O}$  and  $^{10}\text{Be}$ -concentrations<sup>9,25</sup>, authigenic  $^{10}\text{Be}/^9\text{Be}$  ratio (this study), Atlantic dinocysts concentration (per unit mass,<sup>26</sup>) are plotted together. Grey shaded band mark glacial interval (associated to MIS6) characterized by simultaneous minima in  $^{10}\text{Be}/^9\text{Be}$ , and Atlantic dinocysts.

| Sources                                              | <sup>10</sup> Be-<br>concentrations<br>[at/g] | <sup>9</sup> Be-<br>concentrations<br>[pmol/kg] | Resulting <sup>10</sup> Be/ <sup>9</sup> Be<br>(at/at) | Water flux                                                         |
|------------------------------------------------------|-----------------------------------------------|-------------------------------------------------|--------------------------------------------------------|--------------------------------------------------------------------|
| <b>North Atlantic inflow<br/>in the Arctic Ocean</b> | 621                                           | 13.7                                            | $7.51 \times 10^{-8}$                                  | 2.1 Sv through Fram<br>Strait<br>1.7 Sv through the<br>Barents Sea |
| <b>Pacific inflow at<br/>Bering Strait</b>           | 200                                           | 13                                              | $2.55 \times 10^{-8}$                                  | 1 Sv through the Bering<br>Strait                                  |
| <b>Ob</b>                                            | 8982                                          | 1597                                            | $0.93 \times 10^{-8}$                                  | $1.28 \times 10^4$ m <sup>3</sup> /s                               |
| <b>Yenisei</b>                                       | 2935                                          | 316                                             | $1.54 \times 10^{-8}$                                  | $1.97 \times 10^4$ m <sup>3</sup> /s                               |
| <b>Lena</b>                                          | 4416                                          | 1176                                            | $0.62 \times 10^{-8}$                                  | $1.68 \times 10^4$ m <sup>3</sup> /s                               |
| <b>Mackenzie</b>                                     | 683                                           | 315                                             | $0.36 \times 10^{-8}$                                  | $9.73 \times 10^3$ m <sup>3</sup> /s                               |

131

132 **Extended Data Table 1** | Be isotopes concentrations from Frank et al. (2009) used as endmembers in this study's Be  
133 mass balance calculation and water fluxes.

134

135 **References:**

- 136 1. Backman, J., Jakobsson, M., Løvlie, R., Polyak, L. & Febo, L. A. Is the central Arctic Ocean a sediment starved  
137 basin? in *Quaternary Science Reviews* vol. 23 1435–1454 (2004).
- 138 2. Wollenburg, J. E. *et al.* Omnipresent authigenic calcite distorts Arctic radiocarbon chronology. *Commun.*  
139 *Earth Environ.* **4**, (2023).
- 140 3. Geibert, W., Matthiessen, J., Stimac, I., Wollenburg, J. & Stein, R. Glacial episodes of a freshwater Arctic  
141 Ocean covered by a thick ice shelf. *Nature* **590**, 97–102 (2021).
- 142 4. Song, T., Hillaire-Marcel, C., Liu, Y., Ghaleb, B. & de Vernal, A. Cycling and behavior of <sup>230</sup>Th in the Arctic  
143 Ocean: Insights from sedimentary archives. *Earth-Science Reviews* vol. 244 Preprint at  
144 <https://doi.org/10.1016/j.earscirev.2023.104514> (2023).
- 145 5. Frank, M. & Eisenhauer, A. Radionuclides analysed on sediment core PS1533-3 from the Arctic Ocean.  
146 *PANGAEA* <https://doi.org/10.1594/PANGAEA.50830>, (1996).

- 147 6. Eisenhauer, A. *et al.*  $^{10}\text{Be}$  records of sediment cores from high northern latitudes: Implications for  
148 environmental and climatic changes. *Earth Planet. Sci. Lett.* **124**, 171–184 (1994).
- 149 7. Scholten, J. C. *et al.* High Resolution  $^{230}\text{Th}_{ex}$  Stratigraphy of Sediments from High-Latitude Areas (Norwegian  
150 Sea, Fram Strait). *Earth and Planetary Science Letters* vol. 101 (1990).
- 151 8. Bischof, J., Koch, J., Kubisch, M., Spielhagen, R. F. & Thiede, J. Nordic Seas surface ice drift reconstructions:  
152 evidence from ice rafted coal fragments during oxygen isotope stage 6. *Geological Society, London, Special  
153 Publications* **53**, 235–251 (1990).
- 154 9. Knies, J. *et al.* Late Quaternary Growth and Decay of the Svalbard/Barents Sea Ice Sheet and  
155 Paleooceanographic Evolution in the Adjacent Arctic Ocean. vol. 18 (1999).
- 156 10. Nowaczyk, N. R., Antonow, M., Knies, J. & Spielhagen, R. F. Further rock magnetic and chronostratigraphic  
157 results on reversal excursions during the last 50 ka as derived from northern high latitudes and discrepancies  
158 in precise AMS  $^{14}\text{C}$  dating. *Geophys. J. Int.* **155**, 1065–1080 (2003).
- 159 11. Nørgaard-Pedersen, N., Spielhagen, R. F., Thiede, J. & Kassens, H. Sedimentology and stable carbon and  
160 oxygen isotope record of the Central Arctic. (1998).
- 161 12. Hillaire-Marcel, C. *et al.* A New Chronology of Late Quaternary Sequences from the Central Arctic Ocean  
162 Based on “Extinction Ages” of Their Excesses in  $^{231}\text{Pa}$  and  $^{230}\text{Th}$ . *Geochemistry, Geophysics, Geosystems* **18**,  
163 4573–4585 (2017).
- 164 13. Stein, R. *et al.* Towards a better (litho-) stratigraphy and reconstruction of Quaternary paleoenvironment in  
165 the Amerasian Basin (Arctic Ocean). *Polarforschung* **79**, 97–121 (2010).
- 166 14. Adler, R. E. *et al.* Sediment record from the western Arctic Ocean with an improved Late Quaternary age  
167 resolution: HOTRAX core HLY0503-8JPC, Mendeleev Ridge. *Glob. Planet. Change* **68**, 18–29 (2009).
- 168 15. Jang, K. *et al.* Glacial freshwater discharge events recorded by authigenic neodymium isotopes in sediments  
169 from the Mendeleev Ridge, western Arctic Ocean. *Earth Planet. Sci. Lett.* **369–370**, 148–157 (2013).
- 170 16. Spielhagen, R. F. *et al.* Arctic Ocean deep-sea record of northern Eurasian ice sheet history. *Quat. Sci. Rev.*  
171 **23**, 1455–1483 (2004).
- 172 17. Spielhagen, R. F. *et al.* Arctic Ocean evidence for late Quaternary initiation of northern Eurasian ice sheets.  
173 *Geology* **25**, 783–786 (1997).
- 174 18. Paetsch, H. Sedimentation im europäischen Nordmeer: radioisotopische, geochemische und  
175 tonmineralogische Untersuchungen spätquartärer Ablagerungen. (Christian-Albrechts-Universität Kiel,  
176 1991).

- 177 19. Savranskaia, T. *et al.* Removing Climatic Overprints in Sedimentary Cosmogenic Beryllium Records: Potentials  
178 and Limits. *Geochemistry, Geophysics, Geosystems* **25**, e2024GC011761 (2024).
- 179 20. Ahn, S., Khider, D., Lisiecki, L. E. & Lawrence, C. E. A probabilistic Pliocene–Pleistocene stack of benthic  $\delta^{18}\text{O}$   
180 using a profile hidden Markov model. *Dynamics and Statistics of the Climate System* **2**, dzx002 (2017).
- 181 21. Lisiecki, L. E. & Raymo, M. E. A Pliocene–Pleistocene stack of 57 globally distributed benthic  $\delta^{18}\text{O}$  records.  
182 *Paleoceanography* **20**, (2005).
- 183 22. Schoster, F., Behrends, M., Müller, C., Stein, R. & Wahsner, M. Modern river discharge and pathways of  
184 supplied material in the Eurasian Arctic Ocean: evidence from mineral assemblages and major and minor  
185 element distribution. *International Journal of Earth Sciences* **89**, 486–495 (2000).
- 186 23. Vogelgesang, E. *Paläo-Ozeanographie Des Europäischen Nordmeeres an Hand Stabiler Kohlenstoff- Und*  
187 *Sauerstoffisotope*. (Kiel, Germany, 1990). doi:10.2312/reports-sfb313.1990.23.
- 188 24. Henrich, R. Beckenanalyse des Europäischen Nordmeeres: pelagische und glaziomarine Sedimentflüsse im  
189 Zeitraum 2.6 Ma bis rezent. *Math.-Nat. Fak., Univ. Kiel. Unpubl. Habil -thesis* (1992).
- 190 25. Knies, J. & Stein, R. New aspects of organic carbon deposition and its paleoceanographic implications along  
191 the northern Barents Sea margin during the last 30,000 years. *Paleoceanography* **13**, 384–394 (1998).
- 192 26. Matthiessen, J., Knies, J., Nowaczyk, N. R. & Stein, R. *Late Quaternary Dinoflagellate Cyst Stratigraphy at the*  
193 *Eurasian Continental Margin, Arctic Ocean: Indications for Atlantic Water Inflow in the Past 150,000 Years.*  
194 *Global and Planetary Change* vol. 31 www.elsevier.com/locate/ergloplacha (2001).
- 195
- 196
