# Supplementary material
Source: Research Square preprint supplement (doi:10.21203/rs.3.rs-9113149/v1)
Supplement: Supplementary file 2 [file 3229737cabee8878cfff1ee5.pdf]

**Supplement 2: 234U, 238U, 230Th and <sup>230</sup>Th<sub>ex</sub> concentrations in (dpm/g) from GIK23065-3 core and reference material.**

| Sample                     | 234U      | SD        | 238U      | SD        | 230Th     | SD        | 230Th <sub>ex</sub> |
|----------------------------|-----------|-----------|-----------|-----------|-----------|-----------|---------------------|
| Th-GIK23065-3_63.5cm       | 1.6318131 | 0.0104332 | 1.6446437 | 0.0040281 | 2.7069453 | 0.0413163 | 1.0751322           |
| Th-GIK23065-3_73.5cm       | 1.7491401 | 0.0131992 | 1.7093064 | 0.003128  | 4.3807623 | 0.1603486 | 2.6316222           |
| Th-GIK23065-3_80.5cm       | 1.8701571 | 0.0184153 | 1.8931331 | 0.0033196 | 3.931999  | 0.0237652 | 2.061842            |
| Th-GIK23065-3_94.5cm       | 1.7514499 | 0.0164291 | 1.7421411 | 0.0035853 | 3.0585521 | 0.0215131 | 1.3071022           |
| Th-GIK23065-3_97.5cm       | 1.9193669 | 0.0164943 | 1.8956926 | 0.0085249 | 3.3692048 | 0.1035993 | 1.4498379           |
| Th-GIK23065-3_116.5cm      | 1.8268182 | 0.0211513 | 1.7725443 | 0.0057078 | 3.3240957 | 0.0152102 | 1.4972775           |
| Th-GIK23065-3_134.5cm      | 1.3044185 | 0.0071309 | 1.2518013 | 0.0028826 | 2.9014734 | 0.0897613 | 1.5970549           |
| Th-GIK23065-3_142.5cm      | 1.1918641 | 0.0128627 | 1.1504313 | 0.0017486 | 1.9920742 | 0.0289351 | 0.8002101           |
| Th-GIK23065-3_146.5cm      | 1.2984318 | 0.0170468 | 1.2602354 | 0.0049906 | 2.7755157 | 0.0739599 | 1.4770839           |
| Th-GIK23065-3_158.5cm      | 1.4774454 | 0.0078915 | 1.4348544 | 0.0033179 | 2.1323397 | 0.0367108 | 0.6548942           |
| Th-GIK23065-3_163cm        | 1.5656261 | 0.0265847 | 1.5368678 | 0.0059938 | 1.3597615 | 0.0789024 | -0.205865           |
| Th-GIK23065-3_173.5cm      | 1.7582493 | 0.0098721 | 1.7132605 | 0.0032688 | 5.0358833 | 0.1327541 | 3.277634            |
| Th-GIK23065-3_204.5cm      | 1.204055  | 0.0103408 | 1.2292596 | 0.0047074 | 3.2893172 | 0.0867724 | 2.0852622           |
| Th-GIK23065-3_209.5cm      | 1.2473082 | 0.0075429 | 1.2151773 | 0.004218  | 2.8433911 | 0.0440825 | 1.5960828           |
| Th-GIK23065-3_219.5cm      | 1.3114284 | 0.0112225 | 1.2853069 | 0.001601  | 2.8286371 | 0.0596992 | 1.5172087           |
| Th-GIK23065-3_222.5cm      | 1.1953518 | 0.020085  | 1.1529485 | 0.0036134 | 3.2211831 | 0.043436  | 2.0258313           |
| Th-GIK23065-3_254.5cm      | 1.4406106 | 0.0168678 | 1.4635231 | 0.0031348 | 1.5807415 | 0.0149582 | 0.1401309           |
| Th-GIK23065-3_283.5cm      | 1.5299354 | 0.016897  | 1.5139501 | 0.0047331 | 1.5995364 | 0.0665168 | 0.069601            |
| Th-GIK23065-3_295.5cm      | 1.6058058 | 0.0076655 | 1.6501229 | 0.0068739 | 1.3417108 | 0.0522297 | -0.264095           |
| Th-GIK23065-3_304.5cm      | 1.4002585 | 0.02069   | 1.3787343 | 0.0033603 | 1.2246485 | 0.0089436 | -0.17561            |
| Th-GIK23065-3_335.5cm      | 1.7618356 | 0.0191552 | 1.7565873 | 0.0032245 | 2.4587415 | 0.0106189 | 0.6969059           |
| Th-GIK23065-3_352.5cm      | 1.580507  | 0.0202679 | 1.6048614 | 0.0022655 | 1.862412  | 0.0372843 | 0.281905            |
| Th-GIK23065-3_354.5cm      | 1.303506  | 0.0127052 | 1.3570698 | 0.004165  | 1.1145393 | 0.0334928 | -0.188967           |
| Th-GIK23065-3_365.5cm      | 1.4054022 | 0.0176332 | 1.420832  | 0.0047672 | 1.7817192 | 0.0493378 | 0.376317            |
| Th-GIK23065-3_379.5cm      | 1.2703724 | 0.0091732 | 1.3994569 | 0.0020621 | 1.1004922 | 0.0206919 | -0.16988            |
| Th-GIK23065-3_399.5cm      | 1.5859073 | 0.0104624 | 1.7264682 | 0.0034884 | 2.0250618 | 0.0143548 | 0.4391545           |
| Th-GIK23065-3_420cm        | 1.0430224 | 0.0057309 | 1.1091115 | 0.0006846 | 1.793072  | 0.0609121 | 0.7500496           |
| Th-GIK23065-3_446cm        | 1.4203313 | 0.0107988 | 1.5400168 | 0.0038932 | 1.2646135 | 0.0514278 | -0.155718           |
| Th-GIK23065-3_474cm        | 1.3364801 | 0.011108  | 1.534126  | 0.0031284 | 1.7551682 | 0.0226415 | 0.4186881           |
| Th-GIK23065-3_494.5cm      | 3.1867726 | 0.0172055 | 2.9185419 | 0.0035165 | 3.4898087 | 0.0706832 | 0.3030362           |
| Th-GIK23065-3_499.5cm      | 3.9781777 | 0.0414414 | 2.6678101 | 0.0075481 | 2.5390177 | 0.0714082 | -1.43916            |
| Th-GIK23065-3_504.5cm      | 3.2877404 | 0.0108878 | 2.2252819 | 0.0055432 | 1.5960118 | 0.0559814 | -1.691729           |
| Th-GIK23065-3_516.5cm      | 1.9914014 | 0.0074598 | 1.5221821 | 0.0038462 | 1.4312543 | 0.0571478 | -0.560147           |
| Th-GIK23065-3_524.5cm      | 1.0720315 | 0.0131128 | 1.1600989 | 0.0017244 | 1.5377816 | 0.0278004 | 0.4657501           |
| Th-GIK23065-3_564cm        | 1.167965  | 0.0149643 | 1.2850573 | 0.0028229 | 1.4663431 | 0.0653885 | 0.2983781           |
| <b>Reference materials</b> |           |           |           |           |           |           |                     |
| Th-GIK23065-3_IS-A         | 1.9842863 | 0.0093197 | 1.9340216 | 0.0069628 | 1.7103061 | 0.0183375 | -0.27398            |
| Th-GIK23065-3_IS-B         | 2.043208  | 0.0256194 | 1.9414956 | 0.0057794 | 1.7204344 | 0.0347162 | -0.322774           |
| Th-GIK23065-3_IS-C         | 1.9786505 | 0.0169501 | 1.9038793 | 0.0069018 | 1.6968497 | 0.0326259 | -0.281801           |
| Th-GIK23065-3_IS-D         | 1.9292044 | 0.0168133 | 1.9220463 | 0.0036592 | 1.699432  | 0.0951799 | -0.229772           |
| Th-GIK23065-3_Mess4-A      | 2.6187712 | 0.0207687 | 2.677171  | 0.0075134 | 2.5953711 | 0.0560976 | -0.0234             |
| Th-GIK23065-3_Mess4-B      | 2.5833695 | 0.0264409 | 2.6446183 | 0.0080834 | 2.5374937 | 0.034476  | -0.045876           |
| Th-GIK23065-3_Mess4-C      | 2.5900542 | 0.0186917 | 2.6512333 | 0.0101627 | 2.6875388 | 0.0809128 | 0.0974846           |
| Th-GIK23065-3_Mess4-D      | 2.5083494 | 0.009771  | 2.6666204 | 0.0051845 | 2.5976243 | 0.0738189 | 0.0892749           |

IS stands for IAEA-385 from the Irish Sea reference material (Pham et al., 2008)

| Sample                | 238U<br>dpm/g | SD    | Expected    | Recovery<br>(%) | 230Th<br>dpm/g | SD    | Expected | Recovery<br>(%) |
|-----------------------|---------------|-------|-------------|-----------------|----------------|-------|----------|-----------------|
| Th-GIK23065-3_IS-A    | 1.93          | 0.007 |             |                 | 1.710          | 0.018 |          | 90              |
| Th-GIK23065-3_IS-B    | 1.94          | 0.006 |             |                 | 1.720          | 0.035 | 1.89 ±   | 91              |
| Th-GIK23065-3_IS-C    | 1.90          | 0.007 |             |                 | 1.697          | 0.033 | 0.108    | 90              |
| Th-GIK23065-3_IS-D    | 1.92          | 0.004 |             |                 | 1.699          | 0.095 |          | 90              |
| Th-GIK23065-3_Mess4-A | 2.68          | 0.008 |             | 106             | 2.595          | 0.056 |          |                 |
| Th-GIK23065-3_Mess4-B | 2.64          | 0.008 | 2.52 ± 0.30 | 105             | 2.537          | 0.034 |          |                 |
| Th-GIK23065-3_Mess4-C | 2.65          | 0.010 |             | 105             | 2.688          | 0.081 |          |                 |
| Th-GIK23065-3_Mess4-D | 2.67          | 0.005 |             | 106             | 2.598          | 0.074 |          |                 |

Reference materials were analysed alongside each batch of full digestions. It should be noted that these reference materials are certified for larger sample masses than those used in this study; therefore, some degree of variability may arise from sample heterogeneity at smaller subsample sizes.
