# Supplementary material
Source: Research Square preprint supplement (doi:10.21203/rs.3.rs-9113149/v1)
Supplement: Supplementary file 3 [file b7604ce35282401120a29ef1.pdf]

Supplement 1: 10Be/9Be ratio, 10Be-concentrations, 9Be-concentrations measured in Nordic Seas and Arctic cores... (1/2)

| Core       | Sediment Depth [cm] | Sample Name            | Lat [°N] | Lon [°E] | Water depth [m] | 9Be [at/g] | Uncertainty 9Be (%) | 10Be [at/g] | Uncertainty 10Be (%) | 10Be/9Be    | uncertainty 10Be/9Be [%] | 230Thxs extrema used in Fig. 1 |
|------------|---------------------|------------------------|----------|----------|-----------------|------------|---------------------|-------------|----------------------|-------------|--------------------------|--------------------------------|
| GIK23065-3 | 63.5                | GIK23065_63.5cm        | 68.495   | 0.83166  | 2802            | 2.46E+15   | 5                   | 23069617.2  | 2.770395503          | 9.37642E-08 | 5.716213016              |                                |
| GIK23065-3 | 73.5                | GIK23065_73.5cm        | 68.495   | 0.83166  | 2802            | 3.27E+15   | 5                   | 61976280    | 2.424512057          | 1.89408E-08 | 5.556820918              |                                |
| GIK23065-3 | 80.5                | GIK23065_80.5cm        | 68.495   | 0.83166  | 2802            | 3.18E+15   | 5                   | 42060201.5  | 2.520525208          | 1.32298E-08 | 5.599379191              |                                |
| GIK23065-3 | 97.5                | GIK23065_97.5cm        | 68.495   | 0.83166  | 2802            | 2.87E+15   | 5                   | 36198244.4  | 2.616005342          | 1.26251E-08 | 5.643003097              |                                |
| GIK23065-3 | 116.5               | GIK23065_116.5cm       | 68.495   | 0.83166  | 2802            | 2.7E+15    | 5                   | -           | -                    | -           | -                        |                                |
| GIK23065-3 | 116.5               | GIK_116.5cm            | 68.495   | 0.83166  | 2802            | 5.96E+15   | 5                   | 104369662   | 2.754648187          | 1.75079E-08 | 5.708597607              |                                |
| GIK23065-3 | 134.5               | GIK23065_134.5cm       | 68.495   | 0.83166  | 2802            | 2.21E+15   | 5                   | 48471424.6  | 2.974628162          | 2.197E-08   | 5.817938871              |                                |
| GIK23065-3 | 142.5               | GIK23065_142.5cm       | 68.495   | 0.83166  | 2802            | 1.78E+15   | 5                   | 40063822.6  | 2.202806997          | 2.25203E-08 | 5.463731204              |                                |
| GIK23065-3 | 152.5               | GIK23065_152.5cm       | 68.5     | 0.83166  | 2802            | 5.31E+15   | 5                   | 94919019    | 2.211743723          | 1.7888E-08  | 5.467340331              |                                |
| GIK23065-3 | 158.5               | GIK_158.5cm            | 68.495   | 0.83166  | 2802            | 5.79E+15   | 5                   | 70217942    | 2.818084175          | 1.21349E-08 | 5.73947719               |                                |
| GIK23065-3 | 163                 | GIK23065_163cm         | 68.495   | 0.83166  | 2802            | 2.6E+15    | 5                   | 6347857.59  | 3.948059007          | 2.4457E-09  | 6.370806065              |                                |
| GIK23065-3 | 173.5               | GIK23065_173.5cm       | 68.495   | 0.83166  | 2802            | 2.21E+15   | 5                   | 33693362.9  | 2.298696933          | 1.52756E-08 | 5.503090731              |                                |
| GIK23065-3 | 187                 | GIK23065_187cm         | 68.5     | 0.83166  | 2802            | 4.09E+15   | 5                   | 153885320   | 2.279981858          | 3.76356E-08 | 5.495299562              | High 230Thxs                   |
| GIK23065-3 | 204.5               | GIK23065_204.5cm       | 68.495   | 0.83166  | 2802            | 3.31E+15   | 5                   | 125243330   | 2.026059694          | 3.77967E-08 | 5.394897393              |                                |
| GIK23065-3 | 209.5               | GIK23065_209.5cm       | 68.495   | 0.83166  | 2802            | 3.25E+15   | 5                   | 119771539   | 2.000604327          | 3.68533E-08 | 5.385389278              |                                |
| GIK23065-3 | 219.5               | GIK_219.5cm            | 68.495   | 0.83166  | 2802            | 4.57E+15   | 5                   | 169259753   | 2.70682908           | 3.69977E-08 | 5.685677063              |                                |
| GIK23065-3 | 222.5               | GIK23065_222.5cm       | 68.495   | 0.83166  | 2802            | 3.38E+15   | 5                   | 174432028   | 2.170256196          | 5.24237E-08 | 5.450689127              |                                |
| GIK23065-3 | 241                 | GIK230065_241cm        | 68.5     | 0.83166  | 2802            | 4.92E+15   | 5                   | 208826977   | 2.198522702          | 4.24864E-08 | 5.462005316              |                                |
| GIK23065-3 | 254.5               | GIK23065_254.5cm       | 68.495   | 0.83166  | 2802            | 2.28E+15   | 5                   | 39927244.8  | 2.272184758          | 1.75302E-08 | 5.492069152              |                                |
| GIK23065-3 | 257.5               | GIK23065_257.5cm       | 68.495   | 0.83166  | 2802            | 1.95E+15   | 5                   | 72615324.9  | 2.27128966           | 3.72313E-08 | 5.491698892              |                                |
| GIK23065-3 | 268                 | GIK230065_268cm        | 68.5     | 0.83166  | 2802            | 3.93E+15   | 5                   | 75946741.5  | 2.345419003          | 1.93174E-08 | 5.522770165              |                                |
| GIK23065-3 | 276.5               | GIK23065_276.5cm       | 68.495   | 0.83166  | 2802            | 2.09E+15   | 5                   | 18375886.2  | 2.837542293          | 8.7738E-09  | 5.645956119              |                                |
| GIK23065-3 | 283.5               | GIK23065_283.5cm       | 68.495   | 0.83166  | 2802            | 1.96E+15   | 5                   | 14161286.6  | 3.273408693          | 7.22532E-09 | 5.976219915              |                                |
| GIK23065-3 | 285                 | GIK230065_285cm        | 68.5     | 0.83166  | 2802            | 4.13E+15   | 5                   | 31159111.1  | 2.296632876          | 7.53973E-09 | 5.50228873               |                                |
| GIK23065-3 | 295.5               | GIK23065_295.5cm       | 68.495   | 0.83166  | 2802            | 2.53E+15   | 5                   | 5943405.51  | 4.021702259          | 2.349E-09   | 6.416703909              |                                |
| GIK23065-3 | 304.5               | GIK23065_304.5cm       | 68.495   | 0.83166  | 2802            | 2.75E+15   | 5                   | 1678210.69  | 6.026669029          | 6.10966E-10 | 7.830756003              | Low 230Thxs                    |
| GIK23065-3 | 312                 | GIK230065_312cm        | 68.5     | 0.83166  | 2802            | 5.12E+15   | 5                   | 29646716.5  | 2.472514231          | 5.79444E-09 | 5.57793211               |                                |
| GIK23065-3 | 330.5               | GIK23065_330.5cm       | 68.5     | 0.83166  | 2802            | 4.85E+15   | 5                   | 26581444.8  | 2.515119377          | 5.48578E-09 | 5.596947872              |                                |
| GIK23065-3 | 340.5               | GIK23065_340.5cm       | 68.495   | 0.83166  | 2802            | 2.91E+15   | 5                   | 22851393.6  | 2.858854379          | 7.84866E-09 | 5.759604879              |                                |
| GIK23065-3 | 352.5               | GIK23065_352.5cm       | 68.495   | 0.83166  | 2802            | 2.64E+15   | 5                   | 25397539.3  | 2.952391608          | 9.61044E-09 | 5.806601089              |                                |
| GIK23065-3 | 365.5               | GIK23065_365.5cm       | 68.495   | 0.83166  | 2802            | 1.51E+15   | 5                   | 17867974.1  | 2.744463257          | 1.18492E-08 | 5.70388998               |                                |
| GIK23065-3 | 379.5               | GIK23065_379.5cm       | 68.495   | 0.83166  | 2802            | 2.05E+15   | 5                   | -           | -                    | -           | -                        |                                |
| GIK23065-3 | 399.5               | GIK23065_399.5cm       | 68.495   | 0.83166  | 2802            | 2.69E+15   | 5                   | 40845485.3  | 2.33542103           | 1.52099E-08 | 5.518531633              |                                |
| GIK23065-3 | 420.5               | GIK23065_420.5cm       | 68.495   | 0.83166  | 2802            | 2.18E+15   | 5                   | 42671380.8  | 2.339498591          | 1.95485E-08 | 5.520258477              |                                |
| GIK23065-3 | 446.5               | GIK23065_446.5cm       | 68.495   | 0.83166  | 2802            | 2.97E+15   | 5                   | 11447384.7  | 3.092184939          | 3.85202E-09 | 5.878912118              |                                |
| GIK23065-3 | 474.5               | GIK23065_474.5cm       | 68.495   | 0.83166  | 2802            | 3.7E+15    | 5                   | 22383377.7  | 2.519150805          | 6.0487E-09  | 5.598760647              |                                |
| PS1235-2   | 27.5                | PS1235-5_27-28cm       | 78.8592  | 1.3098   | 2485            | 6.44E+15   | 5                   | 110476133   | 2.267605398          | 1.71534E-08 | 5.831375108              |                                |
| PS1235-2   | 197                 | PS1235-5_196.5-196.5cm | 78.8592  | 1.3098   | 2485            | 6.2E+15    | 5                   | 61645796.1  | 2.297730598          | 9.94753E-09 | 5.502687153              | High 230Thxs                   |
| PS1235-2   | 283                 | PS1235-2_283cm         | 78.8592  | 1.3098   | 2485            | 5.4E+15    | 5                   | 153441206   | 2.253962267          | 2.84129E-08 | 5.484555215              |                                |
| PS1235-2   | 350                 | PS1235-2_350cm         | 78.8592  | 1.3098   | 2485            | 5.3E+15    | 5                   | 148291181   | 2.246148224          | 2.79908E-08 | 5.481348543              |                                |
| PS1235-2   | 365.5               | PS1235-5_365-366cm     | 78.8592  | 1.3098   | 2485            | 5.34E+15   | 5                   | 19728744.1  | 2.658010558          | 3.69253E-09 | 5.662598355              |                                |
| PS1235-2   | 387.5               | PS1235-2_387.5cm       | 78.8592  | 1.3098   | 2485            | 6.08E+15   | 5                   | 14271755.6  | 2.620998817          | 2.34873E-09 | 5.645319725              | Low 230Thxs                    |
| PS1235-2   | 428.5               | PS1235-5_428-429cm     | 78.8592  | 1.3098   | 2485            | 6.88E+15   | 5                   | 30134388.3  | 2.348976022          | 4.38072E-09 | 5.524281705              |                                |
| PS1235-2   | 452.5               | PS1235-5_452-453cm     | 78.8592  | 1.3098   | 2485            | 4.37E+15   | 5                   | 44522541.4  | 2.607830523          | 1.0186E-08  | 5.639218034              |                                |
| PS1235-2   | 538.5               | PS1235-2_538.5cm       | 78.8592  | 1.3098   | 2485            | 4.84E+15   | 5                   | 147895457   | 2.247353174          | 3.05614E-08 | 5.481842417              |                                |
| PS1533-3   | 32.5                | PS1533_32-33cm         | 82.19    | 15.107   | 2030            | 2E+16      | 5                   | 38101882.6  | 2.280578423          | 1.90901E-09 | 5.495547101              |                                |
| PS1533-3   | 247.5               | PS1533_247-248cm       | 82.19    | 15.107   | 2030            | 6.91E+15   | 5                   | 47933990.7  | 2.441304336          | 6.93453E-09 | 5.564168119              |                                |
| PS1533-3   | 252.5               | PS1533_252-253cm       | 82.19    | 15.107   | 2030            | 7.47E+15   | 5                   | 48654902.3  | 2.37589519           | 6.51587E-09 | 5.535781603              |                                |
| PS1533-3   | 382.5               | PS1533-3_382.5cm       | 82.19    | 15.107   | 2030            | 4.97E+15   | 5                   | 154030492   | 2.246681285          | 3.10167E-08 | 5.481567002              | High 230Thxs                   |
| PS1533-3   | 412.5               | PS1533_412-413cm       | 82.19    | 15.107   | 2030            | 4.35E+15   | 5                   | 14078221.6  | 2.973621601          | 3.23364E-09 | 5.817424295              |                                |
| PS1533-3   | 452.5               | PS1533_452-453cm       | 82.19    | 15.107   | 2030            | 5.01E+15   | 5                   | 8648452.24  | 3.017871177          | 1.72628E-09 | 5.840166645              | Low 230Thxs                    |
| PS2185-6   | 45.5                | PS2185_45.5cm          | 87.5293  | 144.1662 | 1073            | 5.36E+15   | 5                   | 2973848.72  | 7.455779307          | 5.54499E-10 | 8.97711786               |                                |
| PS2185-6   | 55.5                | PS2185_55.5cm          | 87.5293  | 144.1662 | 1073            | 4.49E+15   | 5                   | 2886122.35  | 8.275726617          | 6.43223E-10 | 9.668901232              |                                |
| PS2185-6   | 65.5                | PS2185_65.5cm          | 87.5293  | 144.1662 | 1073            | 5.28E+15   | 5                   | 52185716.9  | 2.604143034          | 9.88793E-09 | 5.63751372               | High 230Thxs                   |
| PS2185-6   | 85.5                | PS2185_85.5cm          | 87.5293  | 144.1662 | 1073            | 3.71E+15   | 5                   | 4892603.46  | 6.292403912          | 1.31976E-09 | 8.037060843              |                                |
| PS2185-6   | 103                 | PS2185_103cm           | 87.5293  | 144.1662 | 1073            | 4.02E+15   | 5                   | 2653451.78  | 6.842390503          | 6.59986E-10 | 8.474568295              | Low 230Thxs                    |
| PS2185-6   | 106.5               | PS2185_106.5cm         | 87.5293  | 144.1662 | 1073            | 2.7E+15    | 5                   | 2795093.16  | 7.05955428           | 1.03352E-09 | 8.650855832              |                                |
| PS2185-6   | 145.5               | PS2185_145.5cm         | 87.5293  | 144.1662 | 1073            | 7.45E+15   | 5                   | 131528409   | 2.423929175          | 1.76484E-08 | 5.556566624              |                                |

Supplement 1: 10Be/9Be ratio, 10Be-concentrations, 9Be-concentrations measured in Nordic Seas and Arctic cores...

(2/2)

| Core       | Sediment Depth [cm] | Sample Name        | Lat [°N] | Lon [°E] | Water depth [m] | 9Be [at/g] | Uncertainty 9Be (%) | 10Be [at/g] | Uncertainty 10Be (%) | 10Be/9Be    | uncertainty 10Be/9Be [%] | 230Thxs extrema used in Fig. 1 |
|------------|---------------------|--------------------|----------|----------|-----------------|------------|---------------------|-------------|----------------------|-------------|--------------------------|--------------------------------|
| PS2200-5   | 31.5                | PS2200_31-32cm     | 85.3277  | -14.022  | 1073            | 3.38E+15   | 5                   | 807631.828  | 6.236988957          | 2.38654E-10 | 7.993749511              |                                |
| PS2200-5   | 43.5                | PS2200_43-44cm     | 85.3277  | -14.022  | 1073            | 8.19E+15   | 5                   | 749646.549  | 5.687829727          | 9.15484E-11 | 7.573071174              |                                |
| PS2200-5   | 57.5                | PS2200_5_57.5cm    | 85.3277  | -14.022  | 1073            | 3.27E+15   | 5                   | 29724182.9  | 2.458573891          | 9.08364E-09 | 5.571766827              | High 230Thxs                   |
| PS2200-5   | 67.5                | PS2200_67-68cm     | 85.3277  | -14.022  | 1073            | 3.28E+15   | 5                   | 3108390.61  | 3.878473106          | 9.46653E-10 | 6.327918586              |                                |
| PS2200-5   | 72.5                | PS2200_72-73cm     | 85.3277  | -14.022  | 1073            | 4.58E+15   | 5                   | 2975171.96  | 4.463156333          | 6.48895E-10 | 6.70222086               | Low 230Thxs                    |
| PS2200-5   | 92.5                | PS2200-5_92.5cm    | 85.3277  | -14.022  | 1073            | 3.53E+15   | 5                   | 65579946.4  | 2.302340797          | 1.86002E-08 | 5.504613805              |                                |
| PS2200-5   | 108.5               | PS2200-5_108.5cm   | 85.3277  | -14.022  | 1073            | 2.89E+15   | 5                   | 70216696.8  | 2.281122635          | 2.43346E-08 | 5.495772965              |                                |
| PS51-038-4 | 17                  | PS51/038_17cm      | 85.13333 | -171.433 | 1515            | 4.5E+15    | 5                   | 13811459.4  | 2.621045966          | 3.0698E-09  | 5.645341615              |                                |
| PS51-038-4 | 25                  | PS51/038_25cm      | 85.13333 | -171.433 | 1515            | 4.43E+15   | 5                   | 4216060.11  | 3.9779968            | 9.50866E-10 | 6.389402049              |                                |
| PS51-038-4 | 30.5                | PS51-038-4_30.5cm  | 85.135   | -171.442 | 1473            | 5.23E+15   | 5                   | 47434695    | 2.363441969          | 9.06447E-09 | 5.530448259              | High 230Thxs                   |
| PS51-038-4 | 37                  | PS51/038_37cm      | 85.13333 | -171.433 | 1515            | 3.32E+15   | 5                   | 5791914.64  | 3.166653649          | 1.74591E-09 | 5.918420003              |                                |
| PS51-038-4 | 43                  | PS51/038_43cm      | 85.13333 | -171.433 | 1515            | 3.65E+15   | 5                   | 4982410.51  | 3.384807527          | 1.36408E-09 | 6.037956773              | Low 230Thxs                    |
| PS51-038-4 | 46.5                | PS51-038-4_46.5cm  | 85.135   | -171.442 | 1473            | 3.7E+15    | 5                   | 31980217.8  | 2.304736089          | 8.63754E-09 | 5.505616082              |                                |
| PS72/396-5 | 16.5                | PS72/396-5_16-17cm | 80.5778  | -162.318 | 2723            | 5.33E+15   | 5                   | 22183021.7  | 2.678052704          | 4.16562E-09 | 5.672033699              |                                |
| PS72/396-5 | 17.5                | PS72/396-5_17-18cm | 80.5778  | -162.318 | 2723            | 4.85E+15   | 5                   | 18941723.9  | 2.470260165          | 3.90348E-09 | 5.576933323              |                                |
| PS72/396-5 | 21.5                | PS72/396-5_21-22cm | 80.5778  | -162.318 | 2723            | 6.12E+15   | 5                   | 88415872.1  | 2.192896337          | 1.44426E-08 | 5.459743066              | High 230Thxs                   |
| PS72/396-5 | 25.5                | PS72/396-5_25-26cm | 80.5778  | -162.318 | 2723            | 4.45E+15   | 5                   | 21823379.1  | 2.750083384          | 4.90164E-09 | 5.70639629               |                                |
| PS72/396-5 | 27.5                | PS72/396-5_27-28cm | 80.5778  | -162.318 | 2723            | 4.06E+15   | 5                   | 10660452.6  | 2.808798938          | 2.62534E-09 | 5.734923842              | Low 230Thxs                    |
| PS72/396-5 | 30.5                | PS72/396-5_30-31cm | 80.5778  | -162.318 | 2723            | 4.17E+15   | 5                   | 11939372.5  | 2.898857078          | 2.86216E-09 | 5.779565067              |                                |
| PS72/396-5 | 34.5                | PS72/396-5_34-35cm | 80.5778  | -162.318 | 2723            | 6.14E+15   | 5                   | 131067711   | 2.212570739          | 2.13624E-08 | 5.467674942              |                                |
| PS87-030-1 | 23.5                | PS87/030_23-24cm   | 88.662   | -61.542  | 1277            | 4.08E+15   | 5                   | 1581112.14  | 4.714693988          | 3.87777E-10 | 6.872287785              |                                |
| PS87-030-1 | 40.5                | PS87/030_40-41cm   | 88.662   | -61.542  | 1277            | 3.29E+15   | 5                   | 1049851.28  | 5.75203384           | 3.19424E-10 | 7.621410191              |                                |
| PS87-030-1 | 54.75               | PS87-030-1_54.75cm | 88.662   | -61.542  | 1277            | 3.78E+15   | 5                   | 21117821.8  | 2.435011542          | 5.57964E-09 | 5.561410002              |                                |
| PS87-030-1 | 57.5                | PS87/030_57-58cm   | 88.662   | -61.542  | 1277            | 2.55E+15   | 5                   | 16322483.5  | 2.50129728           | 6.40563E-09 | 5.590750225              | Low 230Thxs                    |
| PS87-030-1 | 60.5                | PS87/030_60-61cm   | 88.662   | -61.542  | 1277            | 3.44E+15   | 5                   | 30183924.7  | 2.440138709          | 8.77303E-09 | 5.563656794              |                                |
| PS87-030-1 | 65.5                | PS87-030-1_65.5cm  | 88.662   | -61.542  | 1277            | 4.02E+15   | 5                   | 79762051.7  | 2.270811169          | 1.9854E-08  | 5.491501012              | High 230Thxs                   |
| PS2138-1   | 360                 | PS2138-1_360cm     | 81.5377  | 30.8762  | 862             | 4.4E+15    | 5                   | 51471582.3  | 2.708427056          | 1.16971E-08 | 5.686437999              |                                |
| PS2138-1   | 362                 | PS2138-1_362cm     | 81.5377  | 30.8762  | 862             | 4.67E+15   | 5                   | 51311389.9  | 2.832119976          | 1.09889E-08 | 5.74638178               |                                |
| PS2138-1   | 364                 | PS2138-1_364cm     | 81.5377  | 30.8762  | 862             | 5.02E+15   | 5                   | 51262647.1  | 2.881028878          | 1.02088E-08 | 5.770643586              |                                |
| PS2138-1   | 368                 | PS2138-1_368cm     | 81.5377  | 30.8762  | 862             | 5.41E+15   | 5                   | 48072628.6  | 2.911984607          | 8.88598E-09 | 5.786160588              |                                |
| PS2138-1   | 372                 | PS2138-1_372cm     | 81.5377  | 30.8762  | 862             | 5.5E+15    | 5                   | 41472555.7  | 3.081195785          | 7.47229E-09 | 5.873139489              |                                |
| PS2138-1   | 376                 | PS2138-1_376cm     | 81.5377  | 30.8762  | 862             | 5.57E+15   | 5                   | 27600755.8  | 3.281009233          | 4.95811E-09 | 5.980386408              |                                |
| PS2138-1   | 383                 | PS2138-1_383cm     | 81.5377  | 30.8762  | 862             | 4.56E+15   | 5                   | 71301334.1  | 2.635151406          | 1.56259E-08 | 5.651904363              |                                |
| PS2138-1   | 384                 | PS2138-1_384cm     | 81.5377  | 30.8762  | 862             | 4.07E+15   | 5                   | 80909021.2  | 2.486850494          | 1.99015E-08 | 5.584301691              |                                |
| PS2138-1   | 389                 | PS2138-1_389cm     | 81.5377  | 30.8762  | 862             | 4.15E+15   | 5                   | 107191982   | 2.461135383          | 2.58538E-08 | 5.572897574              |                                |
| PS2138-1   | 396                 | PS2138-1_396cm     | 81.5377  | 30.8762  | 862             | 3.34E+15   | 5                   | 74387926.8  | 2.697440719          | 2.22473E-08 | 5.681213465              |                                |
| PS2138-1   | 402                 | PS2138-1_402cm     | 81.5377  | 30.8762  | 862             | 3.64E+15   | 5                   | 120604405   | 2.616773632          | 3.30996E-08 | 5.643359305              |                                |
| PS2138-1   | 406                 | PS2138-1_406cm     | 81.5377  | 30.8762  | 862             | 5.07E+15   | 5                   | 95298749.1  | 2.663909085          | 1.88068E-08 | 5.665369504              |                                |
| PS2138-1   | 410                 | PS2138-1_410cm     | 81.5377  | 30.8762  | 862             | 4.82E+15   | 5                   | 98820922.3  | 2.54829278           | 2.05152E-08 | 5.611933365              |                                |
| PS2138-1   | 412                 | PS2138-1_412cm     | 81.5377  | 30.8762  | 862             | 2.99E+15   | 5                   | 52153527.6  | 2.926977646          | 1.74656E-08 | 5.793720578              |                                |
| PS2138-1   | 414                 | PS2138-1_414cm     | 81.5377  | 30.8762  | 862             | 3.44E+15   | 5                   | 49799633    | 3.270468187          | 1.44878E-08 | 5.974609792              |                                |
| PS2138-1   | 362                 | PS2138-1_362       | 81.5377  | 30.8762  | 862             | 3.51E+15   | 5                   | 42609292    | 2.94517292           | 1.21528E-08 | 5.802934045              |                                |
| PS2138-1   | 366                 | PS2138-1_366       | 81.5377  | 30.8762  | 862             | 3.35E+15   | 5                   | 35206872.1  | 2.507625567          | 1.05198E-08 | 6.349273491              |                                |
| PS2138-1   | 370                 | PS2138-1_370       | 81.5377  | 30.8762  | 862             | 3.28E+15   | 5                   | 29267842.4  | 2.847568492          | 8.93389E-09 | 5.754011324              |                                |
| PS2138-1   | 372                 | PS2138-1_372d      | 81.5377  | 30.8762  | 862             | 3.9E+15    | 5                   | 29750003.7  | 3.00048163           | 7.62022E-09 | 5.831199706              |                                |
| PS2138-1   | 372                 | PS2138-1_372d24    | 81.5377  | 30.8762  | 862             | 4.72E+15   | 5                   | 46460926.6  | 2.668998513          | 9.83574E-09 | 5.667764379              |                                |
| PS2138-1   | 374                 | PS2138-1_374       | 81.5377  | 30.8762  | 862             | 2.55E+15   | 5                   | 13486635.9  | 3.86613166           | 5.2884E-09  | 6.320361857              |                                |
| PS2138-1   | 380                 | PS2138-1_380       | 81.5377  | 30.8762  | 862             | 3.76E+15   | 5                   | 22508723.5  | 2.871898661          | 5.97923E-09 | 6.026874357              |                                |
| PS2138-1   | 384                 | PS2138-1_384d      | 81.5377  | 30.8762  | 862             | 2.77E+15   | 5                   | 47970896.7  | 2.511729595          | 1.73153E-08 | 5.595425413              |                                |
| PS2138-1   | 391                 | PS2138-1_391       | 81.5377  | 30.8762  | 862             | 2.82E+15   | 5                   | 55395495.8  | 2.225685169          | 1.96203E-08 | 5.780448952              |                                |
| PS2138-1   | 400                 | PS2138-1_400       | 81.5377  | 30.8762  | 862             | 3.54E+15   | 5                   | 77838348.3  | 2.141914739          | 2.19895E-08 | 5.439466771              |                                |
| PS2138-1   | 404                 | PS2138-1_404       | 81.5377  | 30.8762  | 862             | 3.86E+15   | 5                   | 79966969.1  | 2.175935254          | 2.07119E-08 | 5.452952799              |                                |
| PS2138-1   | 408                 | PS2138-1_408       | 81.5377  | 30.8762  | 862             | 3.61E+15   | 5                   | 60871214.3  | 2.239565885          | 1.68532E-08 | 5.47865452               |                                |
| PS2138-1   | 416                 | PS2138-1_416       | 81.5377  | 30.8762  | 862             | 2.03E+15   | 5                   | 27987939.8  | 2.625999247          | 1.38178E-08 | 5.647643052              |                                |
| PS2138-1   | 362                 | PS2138-1_362 cm    | 81.5377  | 30.8762  | 862             | 3.29E+15   | 5                   | 34491460.7  | 3.698042142          | 1.04714E-08 | 6.953387004              |                                |
| PS2138-1   | 368                 | PS2138-1_368 cm    | 81.5377  | 30.8762  | 862             | 3.26E+15   | 5                   | 31001299.4  | 3.979224443          | 9.51135E-09 | 6.423147452              |                                |
| PS2138-1   | 370                 | PS2138-1_370 cm    | 81.5377  | 30.8762  | 862             | 3.22E+15   | 5                   | 25742972.2  | 3.506567414          | 8.00434E-09 | 6.107046342              |                                |
| PS2138-1   | 418                 | PS2138-1_418 cm    | 81.5377  | 30.8762  | 862             | 3.28E+15   | 5                   | 48079008    | 2.924471525          | 1.46783E-08 | 6.611849122              |                                |
| PS2138-1   | 420                 | PS2138-1_420 cm    | 81.5377  | 30.8762  | 862             | 3.76E+15   | 5                   | 64471828.1  | 2.641936257          | 1.71406E-08 | 5.655070927              |                                |
| PS2138-1   | 422                 | PS2138-1_422 cm    | 81.5377  | 30.8762  | 862             | 4.63E+15   | 5                   | 63210658.4  | 2.690466234          | 1.3652E-08  | 6.48240722               |                                |
| PS2138-1   | 424                 | PS2138-1_424 cm    | 81.5377  | 30.8762  | 862             | 3.57E+15   | 5                   | 54314012.3  | 2.982088717          | 1.51939E-08 | 5.821756876              |                                |
